# Supplementary material for: Somatostatin Receptor 2 Expression Profiles and Their Correlation with the Efficacy of Somatostatin Analogues in Gastrointestinal Neuroendocrine Tumors
Source: MDPI journal article supplement (doi:10.3390/cancers14030775), 2022-02-02

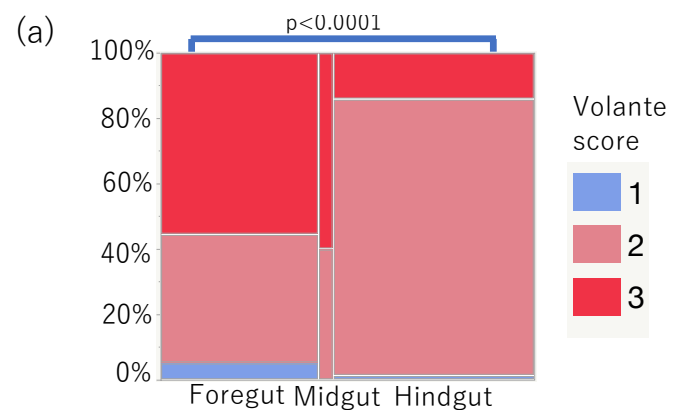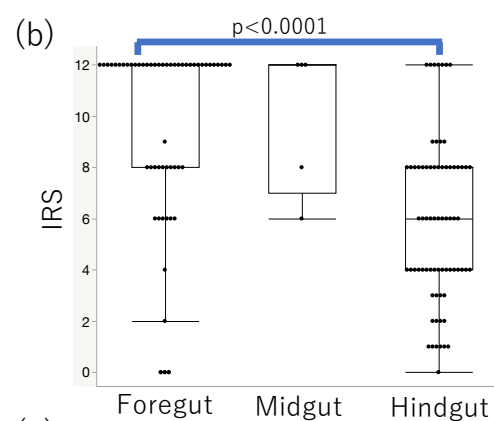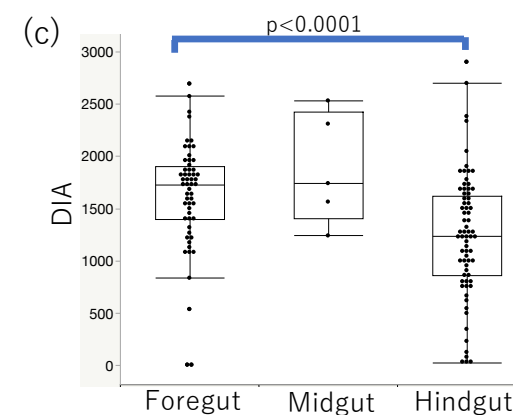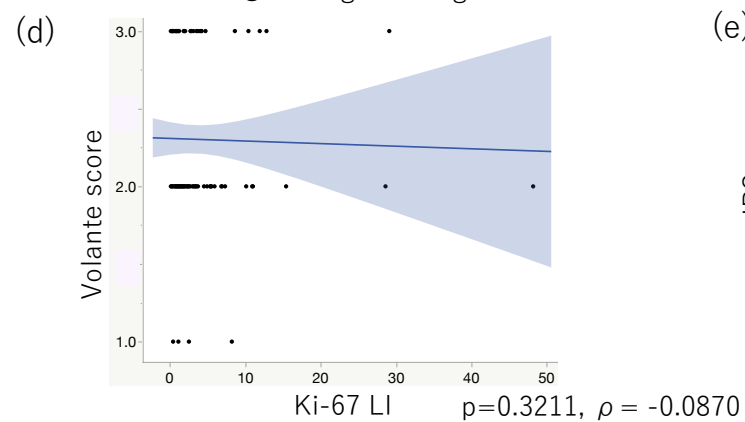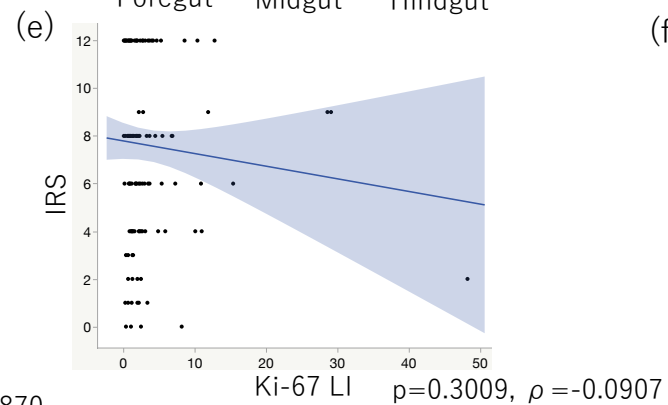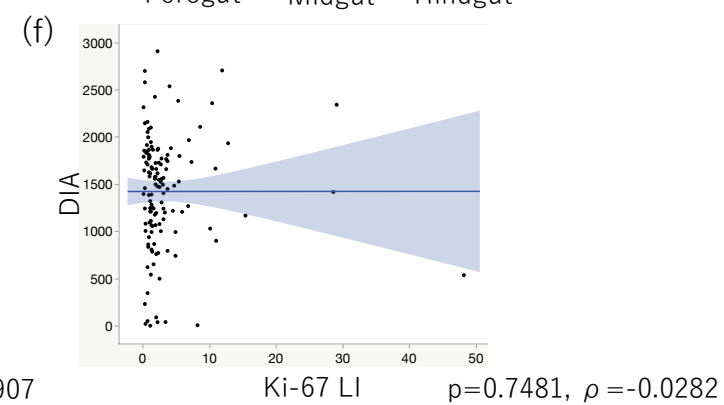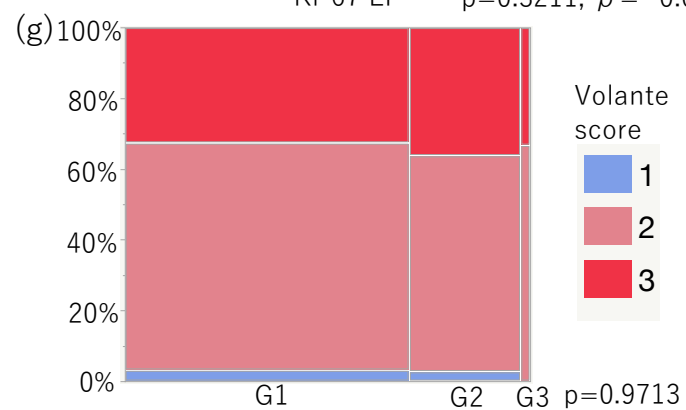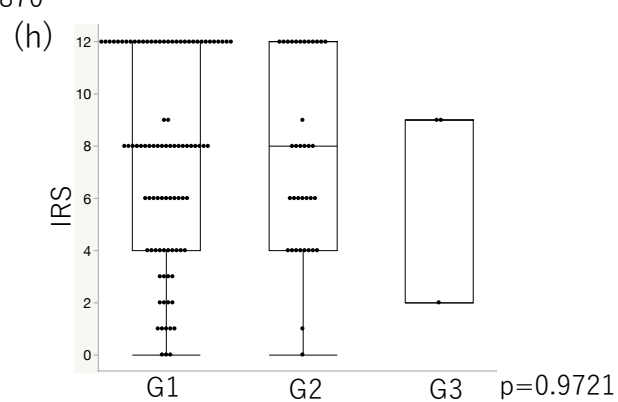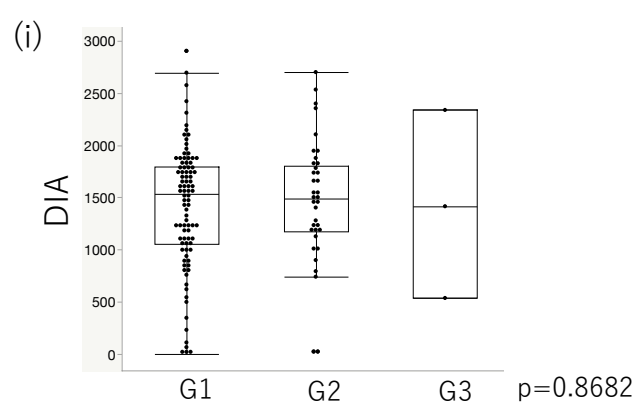

Supplement: s1 [file s1]
