# Supplementary material for: Somatostatin Receptor 2 Expression Profiles and Their Correlation with the Efficacy of Somatostatin Analogues in Gastrointestinal Neuroendocrine Tumors
Source: Cancers (Basel). 2022 Feb 2;14(3):775. doi: 10.3390/cancers14030775 (PMC8834049; doi:10.3390/cancers14030775)
Supplement: Supplementary file 1 [file cancers-14-00775-s001.zip]

Archive with 6 entries (6 files):
- Figure S1.pdf
- Figure S2.pdf
- Figure S3.pdf
- Figure S4.pdf
- Figure S5.pdf
- Supplementary Table.xlsx
