# Supplementary material for: Somatostatin Receptor 2 Expression Profiles and Their Correlation with the Efficacy of Somatostatin Analogues in Gastrointestinal Neuroendocrine Tumors
Source: Cancers (Basel). 2022 Feb 2;14(3):775. doi: 10.3390/cancers14030775 (PMC8834049; doi:10.3390/cancers14030775)
Supplement: Supplementary file 1 [file cancers-14-00775-s001.zip › Supplementary Table.xlsx]

## Sheet: Table S1
	Supplementary Table 1. Summary of clinicopathological characteristics of Group 1									SSTR2 immunoreactivity
											IRS			DIA
	Case No.	Group No.	Sex	Age	Primary location	Embryonal classification of primary location	Tissue origin	Histological Grades	Ki-67 Li	Volante score	positively	staining intensity	SSTR2 (IRS)	% positive cells	Avg Positive cell Membrane OD	Avg Positive Membrane Completeness	VxWxX	Function	Hereditary background
	1	Group 1 and 2	F	77	Stomach	Foregut	primary site	G1	0.1	2	4	2	8	96.4852	0.186724	77.378	1394.05	Non-function	Not detected
	2	Group 1 and 2	F	67	Duodenum	Foregut	primary site	G1	2.4	2	4	3	12	98.268	0.221971	79.09	1725.16	Non-function	Not detected
	3	Group 1 and 2	M	62	Stomach	Foregut	primary site	G2	5.5	2	4	2	8	96.1453	0.223559	83.5549	1795.94	Non-function	Not detected
	4	Group 1 and 2	M	56	Duodenum	Foregut	primary site	G2	8.2	1	0	0	0	0.555899	0.100007	85.6004	4.75885	Non-function	Not detected
	5	Group 1 and 2	M	46	Duodenum	Foregut	primary site	G2	4.2	3	4	3	12	98.5553	0.220834	86.2874	1877.99	Gastrinoma	MEN1
	6	Group 1 and 2	M	74	Stomach	Foregut	primary site	G2	15.4	2	3	2	6	96.3655	0.161127	75.0403	1165.16	Non-function	Not detected
	7	Group 1 and 2	M	65	Duodenum	Foregut	primary site	G1	2.2	2	4	2	8	96.7905	0.238624	80.5716	1860.92	Non-function	Not detected
	8	Group 1 and 2	M	54	Duodenum	Foregut	primary site	G1	0.9	3	4	3	12	97.8121	0.248895	85.6028	2084	Non-function	Not detected
	9	Group 1 and 2	M	75	Rectum	Hindgut	primary site	G1	2.7	2	3	2	6	97.9199	0.19136	81.2069	1521.65	Non-function	Not detected
	10	Group 1 and 2	F	66	Rectum	Hindgut	primary site	G2	6.8	2	4	2	8	96.7991	0.165985	78.8007	1266.11	Non-function	Not detected
	11	Group 1 and 2	M	67	Stomach	Foregut	primary site	G2	10.9	2	3	2	6	90.6277	0.222646	82.4129	1662.92	Non-function	Not detected
	12	Group 1 and 2	M	63	Rectum	Hindgut	primary site	G2	3.7	3	4	2	8	97.5216	0.176158	84.2618	1447.55	Non-function	Not detected
	13	Group 1 and 2	F	46	Rectum	Hindgut	primary site	G1	1.1	2	2	2	4	88.3605	0.16184	87.0582	1244.96	Non-function	Not detected
	14	Group 1 and 2	M	67	Rectum	Hindgut	primary site	G1	1.3	2	4	2	8	77.6709	0.210513	84.9024	1388.22	Non-function	Not detected
	15	Group 1 and 2	F	81	Duodenum	Foregut	primary site	G1	0.8	3	4	3	12	94.1634	0.246068	86.0753	1994.42	Non-function	Not detected
	16	Group 1 and 2	M	61	Rectum	Hindgut	primary site	G1	0.3	2	1	1	1	35.0895	0.0889301	73.6728	229.897	Non-function	Not detected
	17	Group 1 and 2	F	74	Duodenum	Foregut	primary site	G2	5.4	2	3	2	6	90.1108	0.210547	80.4168	1525.71	Gastrinoma	Not detected
	18	Group 1 and 2	M	69	Rectum	Hindgut	primary site	G1	0.4	1	0	0	0	3.22835	0.0803639	76.288	19.7924	Non-function	Not detected
	19	Group 1 and 2	F	58	Duodenum	Foregut	primary site	G2	3.5	3	4	3	12	83.2847	0.246075	86.0097	1762.71	Non-function	Not detected
	20	Group 1 and 2	F	70	Duodenum	Foregut	primary site	G1	2	3	4	3	12	88.9799	0.165422	81.0299	1192.7	Non-function	Not detected
	21	Group 1 and 2	M	39	Duodenum	Foregut	primary site	G1	1.9	2	3	2	6	95.412	0.198033	79.1357	1495.25	Gastrinoma	MEN1
	22	Group 1 and 2	M	79	Rectum	Hindgut	primary site	G1	1.3	2	4	2	8	94.281	0.211039	84.3225	1677.76	Non-function	Not detected
	23	Group 1 and 2	M	58	Rectum	Hindgut	primary site	G1	0.7	2	4	2	8	99.4094	0.228227	81.492	1848.88	Non-function	Not detected
	24	Group 1 and 2	F	58	Rectum	Hindgut	primary site	G1	1.3	2	2	2	4	98.9808	0.223951	85.4634	1894.45	Non-function	Not detected
	25	Group 1 and 2	M	59	Rectum	Hindgut	primary site	G2	11.9	3	3	3	9	99.9016	0.332672	81.2842	2701.44	Non-function	Not detected
	26	Group 1 and 2	F	74	Duodenum	Foregut	primary site	G1	2.8	3	4	3	12	98.9928	0.189964	82.538	1552.13	Non-function	Not detected
	27	Group 1 and 2	F	77	Rectum	Hindgut	primary site	G1	0.7	2	3	1	3	80.7714	0.10083	76.0535	619.393	Non-function	Not detected
	28	Group 1 and 2	M	74	Duodenum	Foregut	primary site	G2	12.8	3	4	3	12	98.3378	0.243108	80.7814	1931.22	Non-function	Not detected
	29	Group 1 and 2	F	43	Rectum	Hindgut	primary site	G1	1.4	2	3	1	3	82.4916	0.117123	81.1056	783.615	Non-function	Not detected
	30	Group 1 and 2	F	66	Duodenum	Foregut	primary site	G1	1	3	4	3	12	97.8223	0.226345	80.5758	1784.08	Non-function	Not detected
	31	Group 1 and 2	M	72	Rectum	Hindgut	primary site	G2	3.7	2	3	2	6	72.2222	0.134367	81.6753	792.6	Non-function	Not detected
	32	Group 1 and 2	F	82	Rectum	Hindgut	primary site	G1	0.7	2	1	1	1	55.0669	0.083935	74.6859	345.201	Non-function	Not detected
	33	Group 1 and 2	M	66	Stomach	Foregut	primary site	G2	3.1	2	2	2	4	98.678	0.137806	82.8633	1126.81	Non-function	Not detected
	34	Group 1 and 2	M	46	Rectum	Hindgut	primary site	G1	0.7	2	4	2	8	92.9627	0.261273	84.4035	2050.05	Non-function	Not detected
	35	Group 1 and 2	F	57	Rectum	Hindgut	primary site	G1	2.2	2	3	3	9	98.9066	0.359993	81.581	2904.75	Non-function	Not detected
	36	Group 1 and 2	M	41	Rectum	Hindgut	primary site	G1	1.2	2	1	1	1	70.4778	0.0992241	77.3049	540.601	Non-function	Not detected
	37	Group 1 and 2	M	57	Stomach	Foregut	primary site	G1	1.8	3	4	3	12	97.479	0.188363	84.7059	1555.32	Non-function	Not detected
	38	Group 1 and 2	M	41	Stomach	Foregut	primary site	G2	3.7	3	4	3	12	94.01	0.237717	80.882	1807.53	Non-function	Not detected
	39	Group 1 and 2	M	60	Stomach	Foregut	primary site	G1	1.6	2	4	3	12	86.9293	0.176692	80.7844	1240.83	Non-function	Not detected
	40	Group 1 and 2	M	59	Rectum	Hindgut	primary site	G2	2.5	2	2	2	4	91.2331	0.201234	79.928	1467.41	Non-function	Not detected
	41	Group 1 and 2	M	63	Rectum	Hindgut	primary site	G1	0.8	2	4	2	8	74.7712	0.139811	82.2228	859.544	Non-function	Not detected
	42	Group 1 and 2	M	60	Duodenum	Foregut	primary site	G1	1.9	3	4	3	12	96.5373	0.217256	82.0852	1721.6	Non-function	Not detected
	43	Group 1 and 2	M	60	Rectum	Hindgut	primary site	G2	7.3	2	3	2	6	99.0834	0.202146	86.5261	1733.06	Non-function	Not detected
	44	Group 1 and 2	F	52	Duodenum	Foregut	primary site		1.1	2	4	2	8	97.5748	0.160444	84.2755	1319.36	Gastrinoma	MEN1
	45	Group 1 and 2	F	59	Duodenum	Foregut	primary site	G1	0.2	3	4	3	12	93.849	0.222647	78.6393	1643.18	Non-function	Not detected
	46	Group 1 and 2	M	61	Rectum	Hindgut	primary site	G1	2.7	2	2	2	4	85.7227	0.143525	81.2728	999.928	Non-function	Not detected
	47	Group 1 and 2	M	57	Rectum	Hindgut	primary site	G1	0.7	2	1	2	2	6.59851	0.0941333	79.2604	49.2318	Non-function	Not detected
	48	Group 1 and 2	M	70	Rectum	Hindgut	primary site	G1	0.2	2	3	2	6	88.1306	0.253588	82.9086	1852.91	Non-function	Not detected
	49	Group 1 and 2	M	67	Duodenum	Foregut	primary site	G1	1	2	4	2	8	97.046	0.228267	80.9092	1792.33	Gastrinoma	MEN1
	50	Group 1 and 2	F	64	Duodenum	Foregut	primary site	G1	0.4	3	4	3	12	95.2141	0.144273	78.6234	1080.04	Non-function	Not detected
	51	Group 1 and 2	M	68	Duodenum	Foregut	primary site	G1	1	2	3	2	6	99.0871	0.137904	79.9297	1092.2	Non-function	Not detected
	52	Group 1 and 2	M	59	Duodenum	Foregut	primary site	G1	0.6	2	4	2	8	93.8303	0.238162	85.5551	1911.88	Non-function	Not detected
	53	Group 1 and 2	M	64	Rectum	Hindgut	primary site	G1	0.4	2	3	1	3	96.2886	0.130901	79.5575	1002.76	Non-function	Not detected
	54	Group 1 and 2	M	69	Rectum	Hindgut	primary site	G2	10.4	3	4	3	12	99.4197	0.270324	87.6307	2355.12	Non-function	Not detected
	55	Group 1 and 2	F	53	Small bowel	Midgut	primary site	G1	0.1	3	4	3	12	89.916	0.300022	85.6921	2311.7	Carcinoid syndrome	Not detected
	56	Group 1 and 2	M	44	Duodenum	Foregut	primary site	G1	0.3	3	4	3	12	94.2119	0.311057	87.9067	2576.13	Non-function	Not detected
	57	Group 1 and 2	M	74	Stomach	Foregut	primary site	G1	0.8	2	3	2	6	69.0897	0.151839	79.569	834.719	Non-function	Not detected
	58	Group 1 and 2	M	45	Stomach	Foregut	primary site	G1	0.5	3	4	3	12	90.4503	0.224515	85.0607	1727.37	Non-function	Not detected
	59	Group 1 and 2	M	61	Rectum	Hindgut	primary site	G3	29.1	3	3	3	9	98.5927	0.284763	83.2902	2338.42	Non-function	Not detected
	60	Group 1 and 2	M	67	Small bowel	Midgut	primary site	G2	4	3	4	3	12	99.9273	0.303841	83.4594	2534	Carcinoid syndrome	Not detected
	61	Group 1 and 2	F	70	Rectum	Hindgut	primary site	G1	1.2	2	2	2	4	98.6782	0.149007	82.1412	1207.78	Non-function	Not detected
	62	Group 1 and 2	M	72	Duodenum	Foregut	primary site	G1	1	3	4	3	12	94.1353	0.200352	83.7703	1579.92	Non-function	Not detected
	63	Group 1 and 2	F	69	Duodenum	Foregut	primary site	G1	0.9	3	4	3	12	98.4436	0.220863	83.1763	1808.46	Non-function	Not detected
	64	Group 1 and 2	M	57	Duodenum	Foregut	primary site	G1	0.9	3	4	3	12	93.9747	0.227574	82.6543	1767.66	Non-function	Not detected
	65	Group 1 and 2	F	51	Duodenum	Foregut	primary site	G1	1.1	2	4	2	8	98.6667	0.186352	87.637	1611.36	Non-function	Not detected
	66	Group 1 and 2	M	42	Stomach	Foregut	primary site	G3	48.2	2	2	1	2	76.8196	0.0874652	79.6845	535.403	Non-function	MEN1
	67	Group 1 and 2	M	55	Rectum	hindgut	primary site	G1	1.9	2	4	3	12	87.9426	0.211996	84.5676	1576.63	Non-function	Not detected
	68	Group 1 and 2	F	40	Duodenum	Foregut	primary site	G1	1.1	1	0	0	0	0	0	0	0	Non-function	Not detected
	69	Group 1 and 2	M	60	Duodenum	Foregut	primary site	G2	3.1	3	4	3	12	93.8292	0.180823	82.6671	1402.57	Non-function	Not detected
	70	Group 1 and 2	F	57	Duodenum	Foregut	primary site	G1	1.8	3	4	3	12	91.0632	0.324593	81.9511	2422.35	Non-function	Not detected
	71	Group 1 and 2	F	62	Small bowel	Midgut	primary site	G1	1.8	2	3	2	6	97.5433	0.196596	81.5927	1564.67	Non-function	Not detected
	72	Group 1 and 2	F	71	Rectum	Hindgut	primary site	G1	1.9	2	4	2	8	90.7351	0.140922	83.2482	1064.46	Non-function	Not detected
	73	Group 1 and 2	F	61	Rectum	Hindgut	primary site	G1	2.8	3	3	3	9	92.9927	0.222342	85.5761	1769.39	Non-function	Not detected
	74	Group 1 and 2	M	51	Rectum	Hindgut	primary site	G1	2.2	2	3	2	6	96.9453	0.200847	82.8588	1613.36	Non-function	Not detected
	75	Group 1 and 2	M	43	Rectum	Hindgut	primary site	G1	2.3	2	4	1	4	80.8389	0.116578	81.7082	770.021	Non-function	Not detected
	76	Group 1 and 2	F	36	Rectum	Hindgut	primary site	G2	3.1	3	4	3	12	92.0898	0.199591	85.1324	1564.76	Non-function	Not detected
	77	Group 1 and 2	M	59	Rectum	Hindgut	primary site	G1	1.7	2	3	2	6	88.2051	0.11937	82.1148	864.59	Non-function	Not detected
	78	Group 1 and 2	M	79	Rectum	Hindgut	primary site	G1	0.7	3	4	3	12	91.7068	0.215845	86.1917	1706.12	Non-function	Not detected
	79	Group 1 and 2	M	53	Rectum	Hindgut	primary site	G1	0.9	2	2	2	4	81.9249	0.133903	85.4219	937.077	Non-function	Not detected
	80	Group 1 and 2	M	38	Rectum	Hindgut	primary site	G2	3.4	2	1	1	1	11.8231	0.0548432	59.8639	38.8167	Non-function	Not detected
	81	Group 1 and 2	F	51	Rectum	Hindgut	primary site	G1	1.1	3	4	3	12	76.0314	0.185672	85.6191	1208.68	Non-function	Not detected
	82	Group 1 and 2	F	61	Rectum	Hindgut	primary site	G2	3.3	2	4	2	8	80.1347	0.176639	84.6227	1197.83	Non-function	Not detected
	83	Group 1 and 3	M	63	Small bowel	Midgut	primary site	G1	0	2	4	1	4	95.3301	0.0913601	88.3006	769.042	Non-function	Not detected
	84	Group 1, 2 and 3	F	60	Rectum	Hindgut	primary site	G2	3	2	3	2	6	96.3819	0.187067	82.7762	1492.44	Non-function	Not detected
	85	Group 1, 2 and 3	M	55	Small bowel	Midgut	primary site	G2	3.7	3	4	3	12	96.1538	0.2204	82.1881	1741.75	Non-function	Not detected
	85	Group 1	M	55	Small bowel	Midgut	Metastatic site (Liver)	-	-	-	-	-	-	-	-	-	-	Non-function	Not detected
	86	Group 1 and 2	M	33	Duodenum	Foregut	primary site	G1	2.7	3	4	3	12	94.0925	0.218285	83.1352	1707.51	Gastrinoma	MEN1
	87	Group 1 and 2	F	57	Duodenum	Foregut	primary site	G1	0.3	3	4	3	12	92.345	0.278507	83.3261	2143.04	Gastrinoma	Not detected
	88	Group 1 and 2	M	61	Duodenum	Foregut	primary site	G1	0.7	3	4	3	12	96.8709	0.274531	81.1147	2157.17	Gastrinoma	Not detected
	89	Group 1 and 2	M	68	Duodenum	Foregut	primary site	G2	6.9	2	4	2	8	92.3214	0.255324	83.2922	1963.35	Gastrinoma	MEN1
	90	Group 1 and 2	F	54	Duodenum	Foregut	primary site	G1	0.9	3	4	3	12	89.2468	0.252455	82.6732	1862.69	Gastrinoma	MEN1
	91	Group 1 and 2	F	59	Duodenum	Foregut	primary site	G1	0.3	3	4	3	12	94.1909	0.333545	85.8121	2695.95	Gastrinoma	MEN1
	92	Group 1 and 2	M	33	Duodenum	Foregut	primary site	G1	0.5	3	4	3	12	93.2638	0.247576	79.2412	1829.67	Gastrinoma	MEN1
	93	Group 1 and 2	F	48	Duodenum	Foregut	primary site	G1	0.1	3	4	3	12	92.4875	0.239913	80.6139	1788.74	Gastrinoma	MEN1
	94	Group 1	M	34	Duodenum	Foregut	primary site	G1	-	-	-	-	-	-	-	-	-	Gastrinoma	MEN1
	95	Group 1 and 3	M	61	Rectum	Hindgut	primary site	G2	7.8	1	0	0	0	33.5771	0.0725992	66.9288	163.15	Non-function	Not detected
	96	Group 1 and 3	F	45	Rectum	Hindgut	primary site	G1	2.3	2	2	1	2	98.9253	0.128345	84.6987	1075.38	Non-function	Not detected
	97	Group 1, 2 and 3	M	65	Rectum	Hindgut	primary site	G2	11	2	2	2	4	99.4805	0.116404	77.6296	898.945	Non-function	Not detected
	97	Group 1	M	65	Rectum	Hindgut	Metastatic site (Liver)	G2	-	-	-	-	-	-	-	-	-	Non-function	Not detected
	98	Group 1 and 3	M	48	Rectum	Hindgut	Metastatic site (Liver)	G2	9	2	2	1	2	97.1087	0.110552	77.3769	830.684	Non-function	Not detected
	99	Group 1	F	67	Rectum	Hindgut	Metastatic site (Liver)	G2	-	-	-	-	-	-	-	-	-	Non-function	Not detected
	99	Group 1 and 2	F	67	Rectum	Hindgut	primary site	G1	2	2	2	1	2	80.9972	0.119499	78.3119	757.987	Non-function	Not detected
	100	Group 1 and 3	M	72	Small bowel	Midgut	Metastatic site (Liver)	G2	12.6	2	4	1	4	94.1388	0.0975652	79.6337	731.409	Carcinoid syndrome	Not detected
	101	Group 1 and 2	M	36	Rectum	Hindgut	primary site	G1	2.2	2	2	2	4	95.8029	0.180124	85.4499	1474.56	Non-function	Not detected
	102	Group 1 and 2	F	54	Rectum	Hindgut	primary site	G1	2.3	2	4	2	8	87.7538	0.258314	82.6834	1874.27	Non-function	Not detected
	103	Group 1 and 2	M	79	Rectum	Hindgut	primary site	G1	2.2	2	1	1	1	3.41328	0.142177	76.8493	37.2942	Non-function	Not detected
	104	Group 1 and 2	M	60	Rectum	Hindgut	primary site	G1	1.3	2	4	2	8	83.6824	0.148585	85.5136	1063.27	Non-function	Not detected
	105	Group 1 and 2	M	76	Rectum	Hindgut	primary site	G1	1.4	2	4	2	8	81.9204	0.15629	82.3579	1054.46	Non-function	Not detected
	106	Group 1 and 2	M	58	Stomach	Foregut	primary site	G2	4.5	2	4	2	8	88.9062	0.17193	79.5906	1216.59	Non-function	Not detected
	107	Group 1 and 2	M	76	Rectum	Hindgut	primary site	G2	3.1	2	2	2	4	97.5875	0.149401	84.9482	1238.52	Non-function	Not detected
	108	Group 1, 2 and 3	M	61	Duodenum	Foregut	primary site	G2	5.3	2	4	3	12	99.7175	0.263203	90.675	2379.85	Non-function	Not detected
	109	Group 1 and 3	M	73	Stomach	Foregut	Metastatic site (Liver)	G2	4.7	1	0	0	0	30.0851	0.0930523	77.0189	215.613	Non-function	Not detected
	110	Group 1, 2 and 3	M	74	Small bowel	Midgut	primary site	G1	0.3	2	4	2	8	96.1612	0.151506	85.153	1240.59	Non-function	Not detected
	111	Group 1 and 3	F	65	Duodenum	Foregut	Metastatic site (Liver)	G1	1.6	2	4	2	8	96.6594	0.18977	80.0057	1467.55	Gastrinoma	MEN1
	112	Group 1 and 3	F	67	Small bowel	Midgut	primary site	G1	0.9	2	2	1	2	91.7114	0.126998	83.0415	967.198	Carcinoid syndrome	Not detected
	113	Group 1 and 2	M	88	Stomach	Foregut	primary site	G1	1.2	3	4	3	12	98.1635	0.241628	81.9169	1942.99	Non-function	Not detected
	114	Group 1 and 2	M	75	Rectum	Hindgut	primary site	G2	3.5	2	3	2	6	90.6542	0.218563	83.6346	1657.11	Non-function	Not detected
	115	Group 1 and 2	M	54	Rectum	Hindgut	primary site	G1	2.4	2	3	2	6	86.0949	0.212173	84.5234	1543.99	Non-function	Not detected
	116	Group 1 and 2	F	60	Rectum	Hindgut	primary site	G1	1.8	2	4	2	8	78.972	0.178302	83.3961	1174.29	Non-function	Not detected
	117	Group 1 and 2	M	76	Rectum	Hindgut	primary site	G1	0.9	2	3	2	6	91.3284	0.216966	81.9148	1623.15	Non-function	Not detected
	118	Group 1 and 2	F	70	Rectum	Hindgut	primary site	G1	2	2	4	2	8	92.7504	0.2169	82.4501	1658.69	Non-function	Not detected
	119	Group 1 and 2	F	64	Rectum	Hindgut	primary site	G1	1.5	2	4	2	8	97.9556	0.22701	83.7374	1862.06	Non-function	Not detected
	120	Group 1 and 2	M	68	Rectum	Hindgut	primary site	G1	1.3	2	3	1	3	79.3478	0.196707	82.0963	1281.38	Non-function	Not detected
	121	Group 1 and 2	M	67	Stomach	Foregut	primary site	G2	8.6	3	4	3	12	90.8213	0.280501	82.6047	2104.39	Non-function	Not detected
	122	Group 1 and 2	M	66	Duodenum	Foregut	primary site	G1	2.5	1	0	0	0	93.9497	0.177393	64.5463	1075.73	Non-function	Not detected
	123	Group 1 and 2	M	64	Rectum	Hindgut	primary site	G1	2.8	3	4	3	12	88.2722	0.178152	82.9829	1304.98	Non-function	Not detected
	124	Group 1 and 2	M	64	Rectum	Hindgut	primary site	G1	1.3	2	2	1	2	81.4875	0.123811	79.8907	806.021	Non-function	Not detected
	125	Group 1 and 2	F	64	Rectum	Hindgut	primary site	G1	0.9	2	4	2	8	90.3531	0.183256	83.5279	1383.03	Non-function	Not detected
	126	Group 1 and 2	M	71	Rectum	Hindgut	primary site	G1	1.3	2	4	1	4	92.5234	0.132216	81.0079	990.976	Non-function	Not detected
	127	Group 1 and 2	M	75	Duodenum	Foregut	primary site	G1	1.8	2	4	2	8	97.5192	0.208311	77.4994	1574.35	Non-function	Not detected
	128	Group 1 and 2	M	73	Rectum	Hindgut	primary site	G1	1.4	2	4	2	8	89.572	0.21644	85.6307	1660.12	Non-function	Not detected
	129	Group 1 and 2	F	42	Stomach	Foregut	primary site	G1	1.2	3	4	3	12	88.4615	0.28562	83.0052	2097.24	Non-function	Not detected
	130	Group 1 and 2	F	67	Rectum	Hindgut	primary site	G1	1.6	2	4	1	4	73.1769	0.109719	81.0268	650.556	Non-function	Not detected
	131	Group 1 and 2	M	61	Stomach	Foregut	primary site	G3	28.6	2	3	3	9	86.4355	0.209708	78.0667	1415.05	Non-function	Not detected
	132	Group 1 and 2	F	57	Rectum	Hindgut	primary site	G2	4.7	3	4	3	12	88.2687	0.205391	81.7331	1481.79	Non-function	Not detected
	133	Group 1 and 2	M	61	Rectum	Hindgut	primary site	G1	2	2	1	1	1	17.7814	0.0667202	74.3805	88.2434	Non-function	Not detected
	134	Group 1 and 2	M	59	Rectum	Hindgut	primary site	G1	1.2	2	3	2	6	97.7076	0.13979	81.2966	1110.39	Non-function	Not detected
	135	Group 1 and 2	M	60	Rectum	Hindgut	primary site	G1	2.5	2	2	1	2	66.1682	0.0933254	80.575	497.565	Non-function	Not detected
	136	Group 1 and 2	F	57	Rectum	Hindgut	primary site	G2	4.9	2	2	2	4	92.219	0.135103	79.5628	991.278	Non-function	Not detected
	137	Group 1 and 2	M	74	Rectum	Hindgut	primary site	G1	1.4	2	2	2	4	92.9739	0.162412	82.8442	1250.95	Non-function	Not detected
	138	Group 1 and 2	F	65	Rectum	Hindgut	primary site	G2	4.9	2	2	2	4	73.6951	0.128542	78.0603	739.459	Non-function	Not detected
	139	Group 1 and 2	M	61	Duodenum	Foregut	primary site	G1	0.3	3	4	3	12	86.7498	0.201962	83.0936	1455.81	N.A.	Not detected
	140	Group 1 and 2	M	46	Rectum	Hindgut	primary site	G2	5.9	2	3	2	4	95.6452	0.15736	80.0853	1205.34	N.A.	Not detected
	141	Group 1, 2 and 3	F	71	Rectum	Hindgut	primary site	G2	10.1	2	2	2	4	96.9027	0.133176	79.639	1027.75	Non-function	Not detected
	141	Group 1	F	71	Rectum	Hindgut	Metastatic site (Liver)	G2	-	-	-	-	-	-	-	-	-	Non-function	Not detected
		Number of cases
	Patients	141
	Tissue	145
	Group 1	5
	Group 1 and 2	126
	Group 1 and 3	8
	Group 1, 2 and 3	6

## Sheet: Table S2
		Supplementary Table 2. Summary of the DeLong test of Group 3
		model	p-value*
		volante score vs IRS	0.8777	non significant by p-value > α/3**
		volante score vs DIA	0.8573	non significant by p-value > α/3**
		IRS vs DIA	0.5819	non significant by p-value > α/3**
		*：Delong test (two-sided)
		**：adjusted p-value (Bonferroni inequality)
